# Supplementary material for: Hydrolytic depolymerization of corncob lignin in the view of a bio-based rigid polyurethane foam synthesis
Source: Royal Society of Chemistry journal article supplement (doi:10.1039/c6ra26318f), 2017-01-01
Supplement: c6ra26318f1.pdf [file c6ra26318f1.pdf]

## Supporting Information

### **Hydrolytic depolymerization of corncob lignin in the view of the bio-based rigid polyurethane foam synthesis**

Bai-Liang Xue<sup>a,b\*</sup>, Pan-Li Huang<sup>c</sup>, Yong-Cang Sun<sup>d</sup>, Xin-Ping Li<sup>a</sup>, Run-Cang Sun<sup>c</sup>

*<sup>a</sup>College of Bioresources Chemistry and Materials Engineering, Shaanxi University of Science & Technology, Xi'an, Shaanxi 710021, China*

*<sup>b</sup>State Key Laboratory of Pulp and Paper Engineering, South China University of Technology, Guangzhou 510640, China*

*<sup>c</sup>Beijing Key Laboratory of Lignocellulosic Chemistry, Beijing Forestry University, Beijing 100083, China*

*<sup>d</sup>Key Laboratory of Subsurface Hydrology and Ecological Effects in Arid Region, Ministry of Education, Chang'an University, Xi'an China*

\*Corresponding authors. Address:

College of Bioresources Chemistry and Materials Engineering, Shaanxi University of Science & Technology, Xi'an, Shaanxi 710021, China.

Tel.: +86-29-86168575.

E-mail address: xuebailiang@sust.edu.cn (B.L. Xue).

**Table S1**

Assignments of major components in the 2D-HSQC spectra of the original lignin and the DL sample obtained under the optimum condition.

| Label                               | $\delta_C/\delta_H$ (ppm) | Assignments                                                                                                |
|-------------------------------------|---------------------------|------------------------------------------------------------------------------------------------------------|
| -OCH <sub>3</sub>                   | 55.7/3.70                 | C-H in methoxyls                                                                                           |
| A <sub><math>\gamma</math></sub>    | 59.5/3.68                 | C <sub><math>\gamma</math></sub> -H <sub><math>\gamma</math></sub> in $\beta$ -O-4 substructures (A)       |
| B <sub><math>\gamma</math></sub>    | 62.3/3.70                 | C <sub><math>\gamma</math></sub> -H <sub><math>\gamma</math></sub> for phenylcoumaran ( $\beta$ -5')(B)    |
| A <sub><math>\alpha</math></sub>    | 71.8/4.86                 | C <sub><math>\alpha</math></sub> -H <sub><math>\alpha</math></sub> in $\beta$ -O-4 linked to a S units (A) |
| A <sub><math>\beta</math></sub> (S) | 85.8/4.12                 | C <sub><math>\beta</math></sub> -H <sub><math>\beta</math></sub> in $\beta$ -O-4 linked to a S units (A)   |
| S <sub>2,6</sub>                    | 103.8/6.70                | C <sub>2,6</sub> -H <sub>2,6</sub> in syringyl units (S)                                                   |
| FA <sub>2</sub>                     | 110.8/7.35                | C <sub>2</sub> -H <sub>2</sub> in ferulates (FA)                                                           |
| G <sub>2</sub>                      | 110.8/6.97                | C <sub>2</sub> -H <sub>2</sub> in guaiacyl units (G)                                                       |
| G <sub>5</sub>                      | 114.5/6.70                | C <sub>5</sub> -H <sub>5</sub> in guaiacyl units (G)                                                       |
| FA <sub>8</sub>                     | 116.5/6.36                | C <sub>8</sub> -H <sub>8</sub> in ferulates (FA)                                                           |
| G <sub>6</sub>                      | 119.0/6.78                | C <sub>6</sub> -H <sub>6</sub> in guaiacyl units (G)                                                       |
| FA <sub>6</sub>                     | 122.1/7.20                | C <sub>6</sub> -H <sub>6</sub> in ferulates (FA)                                                           |
| H <sub>2,6</sub>                    | 127.2/7.12                | C <sub>2,6</sub> -H <sub>2,6</sub> in <i>p</i> -hydroxyphenyl units (H)                                    |
| <i>p</i> -CA <sub>2,6</sub>         | 130.2/7.48                | C <sub>2,6</sub> -H <sub>2,6</sub> in <i>p</i> -coumarates ( <i>p</i> -CA)                                 |
| <i>p</i> -CA <sub>7</sub>           | 144.8/7.51                | C <sub>7</sub> -H <sub>7</sub> in <i>p</i> -coumarates ( <i>p</i> -CA)                                     |

**Table S2**

<sup>31</sup>P NMR spectra analysis of the DL sample obtained under the optimum condition.

| Sample | Aliphatic-OH | CS   | NCS  | CG   | NCG  | NCH  | COOH | total-OH |
|--------|--------------|------|------|------|------|------|------|----------|
| DL     | 0.12         | 0.28 | 0.40 | 0.21 | 1.87 | 1.62 | 0.59 | 5.1      |

<sup>a</sup>CS, condensed syringyl OH; NCS, noncondensed syringyl OH; CG, condensed guaiacyl OH; NCG noncondensed guaiacyl OH; and NCH, noncondensed p-hydroxyphenyl OH.

**Table S3**

GC–MS analysis of DCM-soluble fraction obtained under the optimum condition.

| Peak number    | Retention time (min) | Compound name                     | Relative content by percent area |
|----------------|----------------------|-----------------------------------|----------------------------------|
| 1              | 5.874                | n-Propyl acetate                  | 2.15%                            |
| 2              | 7.310                | Trichloromethane                  | 0.73%                            |
| 3              | 27.105               | Acetic acid                       | 6.09%                            |
| 4              | 27.771               | Ethanedioic acid, diethyl ester   | 0.33%                            |
| 5              | 27.946               | 1-Hexanol, 2-ethyl-               | 0.21%                            |
| 6              | 32.592               | Diethyl methylsuccinate           | 0.63%                            |
| 7              | 33.607               | Butanedioic acid, diethyl ester   | 11.67%                           |
| 8              | 36.500               | Pentanedioic acid, diethyl ester  | 22.66%                           |
| 9              | 39.546               | Diethyl adipate                   | 2.02%                            |
| 10             | 39.956               | Butylated Hydroxytoluene          | 0.24%                            |
| 11             | 42.151               | Diethyl pimelate                  | 0.38%                            |
| 12             | 42.438               | Phenol                            | 1.12%                            |
| 13             | 44.264               | p-Cresol                          | 0.66%                            |
| 14             | 44.464               | Diethyl suberate                  | 0.42%                            |
| 15             | 46.407               | Phenol, 4-ethyl-                  | 0.35%                            |
| 16             | 48.028               | Hexadecanoic acid, ethyl ester    | 0.24%                            |
| 17             | 50.438               | Diethyl Phthalate                 | 0.34%                            |
| 18             | 51.135               | Ethyl hydrogen succinate          | 8.14%                            |
| 19             | 54.879               | Hexanedioic acid, monoethyl ester | 0.68%                            |
| 20             | 57.628               | Catechol                          | 3.55%                            |
| Total area (%) |                      |                                   | 62.61%                           |

<sup>a</sup>The matching degree of all the compounds here were more than 80%, and the compounds whose matching degree less than 80% were not listed.

## Figure Captions

**Fig. S1.** The detailed flow diagram of the separation process for the reaction products.

**Fig. S2.** FT-IR spectra of the original lignin and DL sample obtained under the optimum condition.

**Fig. S3.**  $^{31}\text{P}$  NMR spectra of DL sample obtained under the optimum condition.

**Fig. S4.** Degradation TGA curves (a) and the rate of weight loss (b) of original lignin and DL sample obtained under the optimum condition.

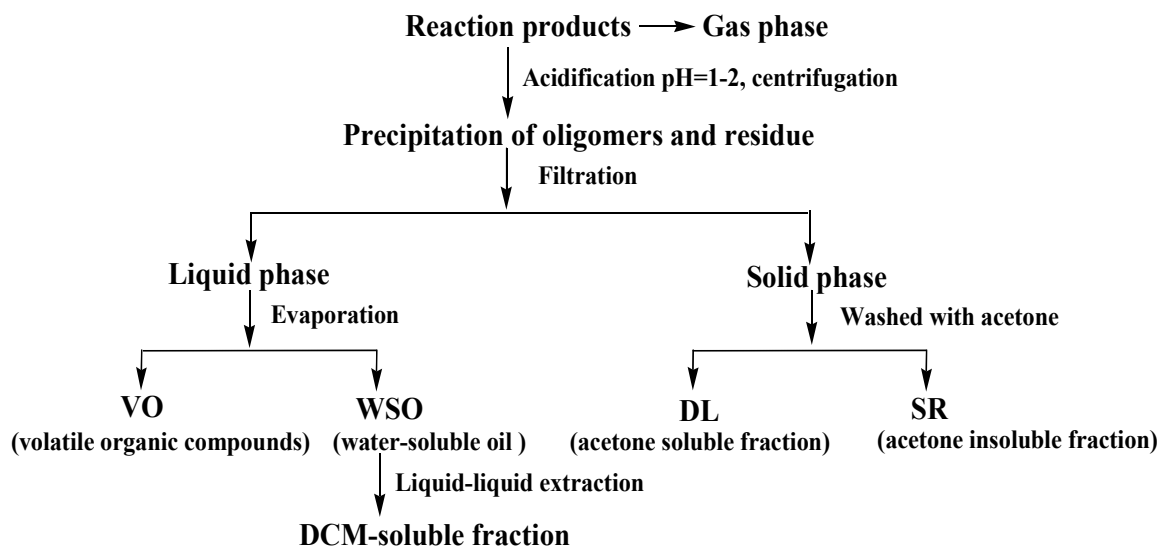

**Fig. S1.**

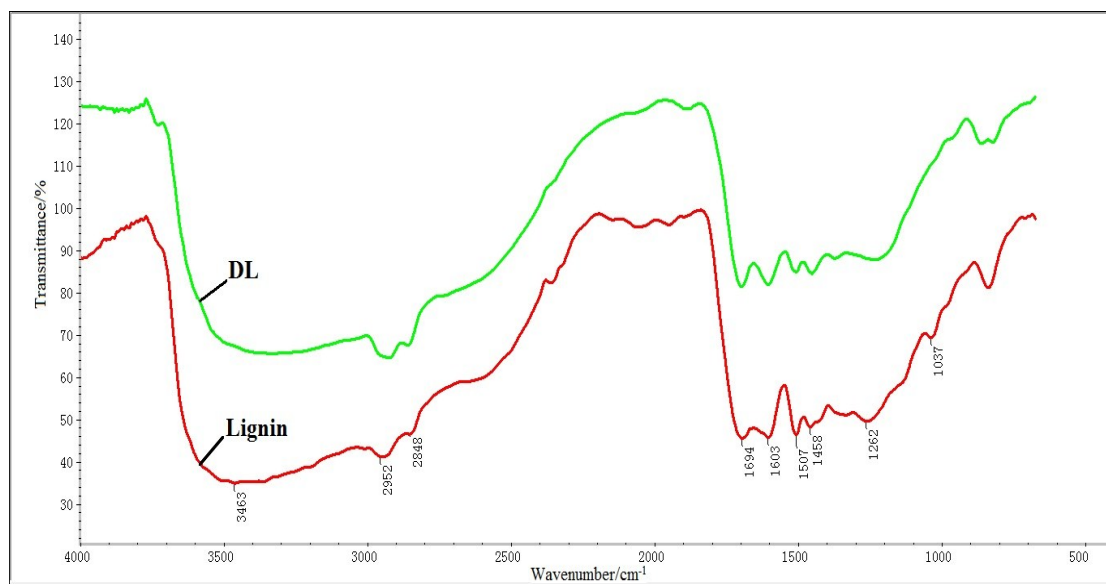

**Fig. S2.**

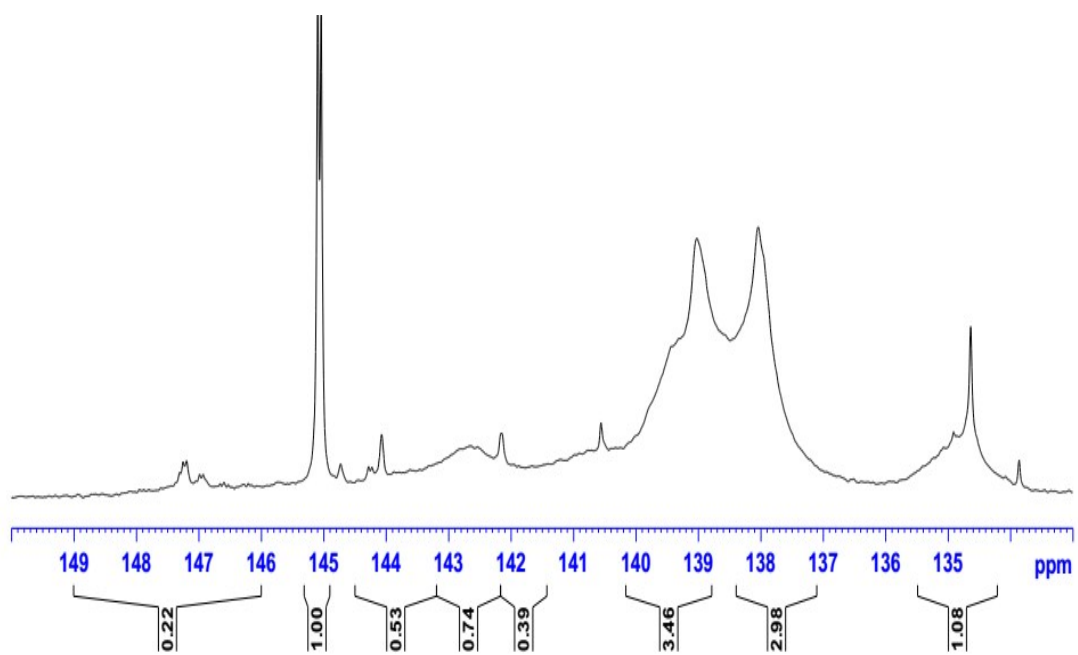

**Fig. S3.**



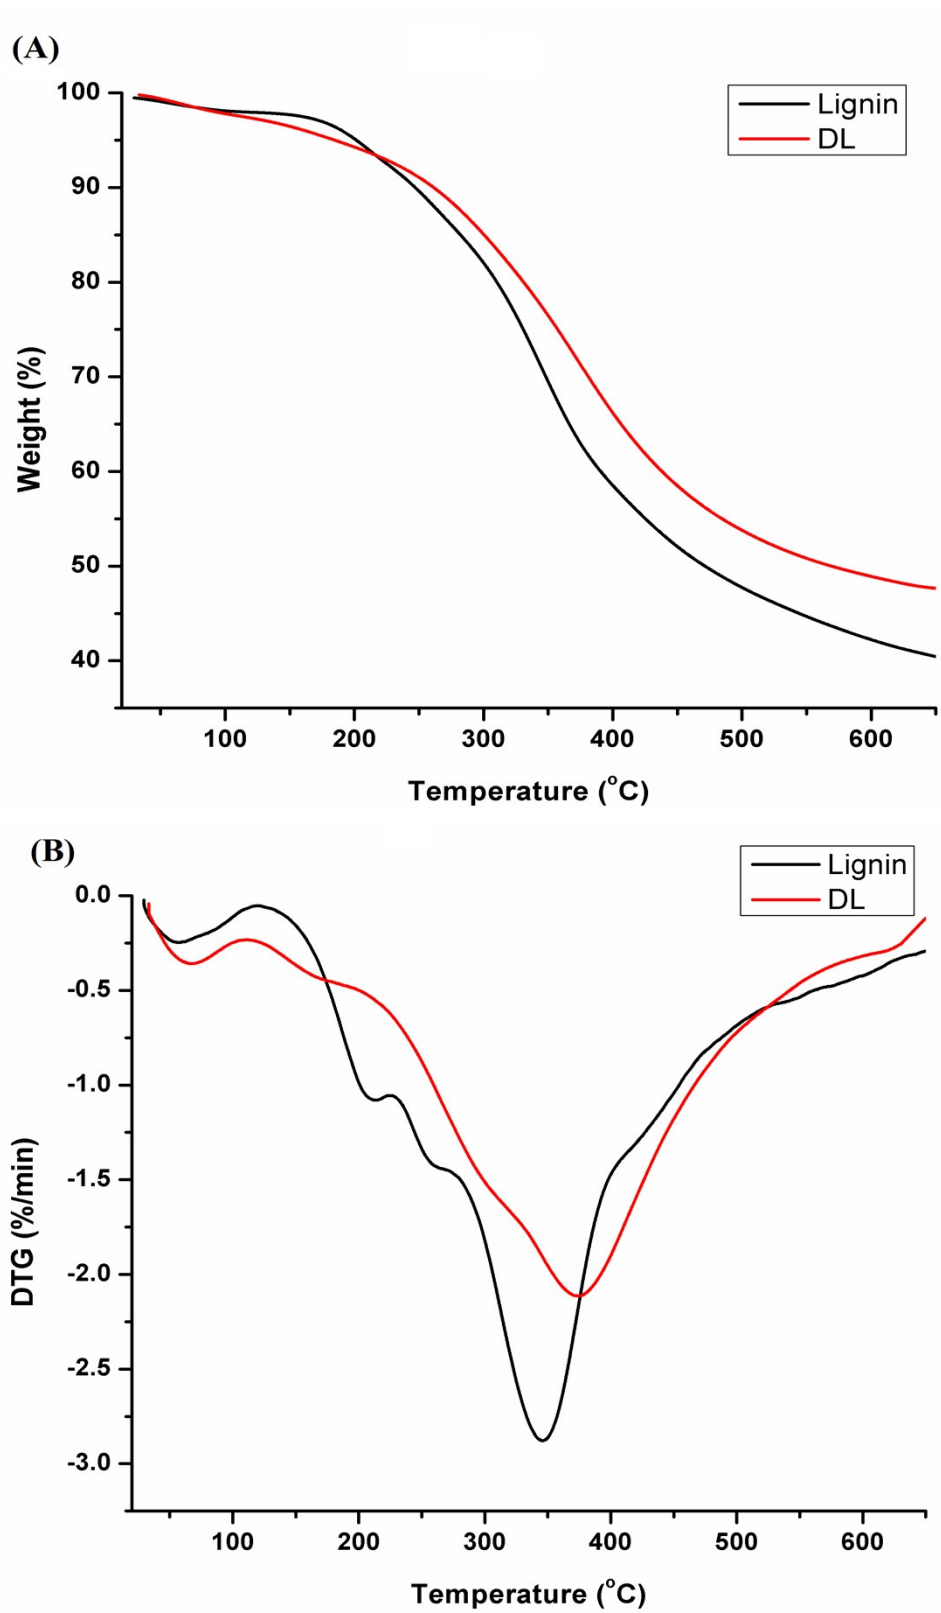

Fig. S4.
